# Supplementary material for: Chitosan Nanocomposite Coatings Containing Chemically Resistant ZnO–SnOx Core–shell Nanoparticles for Photocatalytic Antifouling
Source: MDPI journal article supplement (doi:10.3390/ijms22094513), 2021-04-26

## Supplementary Materials

**Table S1.** Water contact angle (WCA) and water uptake values (i.e., swelling ratio) for chitosan nanocomposite coatings.

| Sample                                       | WCA (degree) | Swelling ratio (%) <sup>1</sup> |
|----------------------------------------------|--------------|---------------------------------|
| CH (1%)/ZnO (1%)                             | 57.9 ± 1.2   | 1.22 ± 0.12                     |
| CH (1%)/ZnO (5%)                             | 64.5 ± 0.3   | 1.12 ± 0.41                     |
| CH (1%)/ZnO (10%)                            | 75.5 ± 0.9   | 1.05 ± 0.21                     |
| CH (1%)/ZnO-SnO <sub>x</sub> (1%)            | 58.1 ± 1.0   | 1.28 ± 0.08                     |
| CH (1%)/ZnO-SnO <sub>x</sub> (5%)            | 63.4 ± 0.5   | 1.03 ± 0.14                     |
| CH (1%)/ZnO-SnO <sub>x</sub> (10%)           | 72.7 ± 1.2   | 1.05 ± 0.02                     |
| CH (1%)/ZnO (1%)/GA (2.5%)                   | 63.8 ± 0.7   | 0.89 ± 0.06                     |
| CH (1%)/ZnO (5%)/GA (2.5%)                   | 66.8 ± 0.1   | 0.83 ± 0.09                     |
| CH (1%)/ZnO (10%)/GA (2.5%)                  | 78.8 ± 0.4   | 0.80 ± 0.16                     |
| CH (1%)/ZnO-SnO <sub>x</sub> (1%)/GA (2.5%)  | 67.6 ± 1.1   | 0.73 ± 0.07                     |
| CH (1%)/ZnO-SnO <sub>x</sub> (5%)/GA (2.5%)  | 69.3 ± 0.6   | 0.65 ± 0.18                     |
| CH (1%)/ZnO-SnO <sub>x</sub> (10%)/GA (2.5%) | 77.5 ± 0.3   | 0.60 ± 0.03                     |

<sup>1</sup> Values are given as means ± standard deviation (n=5).

**Figure S1.** A mesocosm experiment at the light conditions. The nanocomposite coatings were incubated horizontally in a basket.

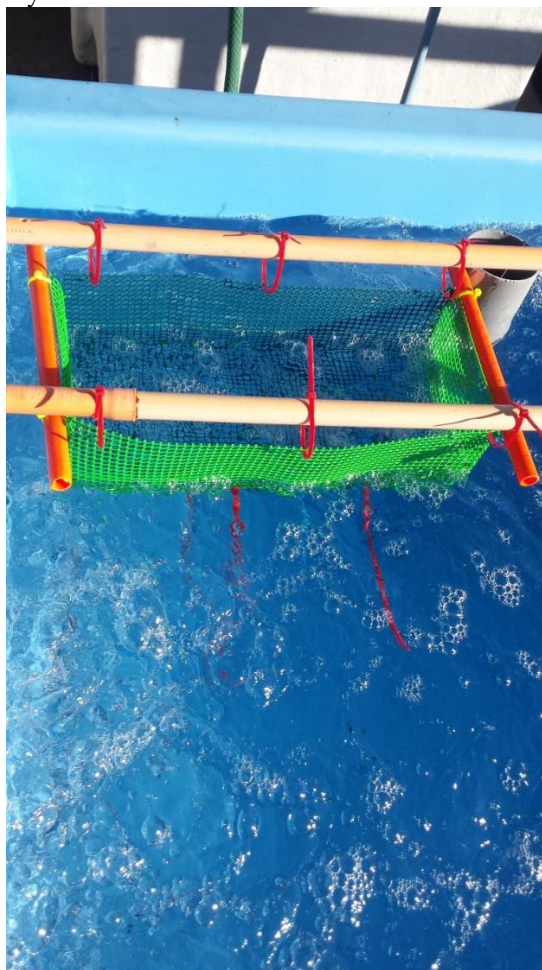

**Figure S2.** A mesocosm experiment at the dark conditions. In order to prevent the light, the tank was covered with black net.

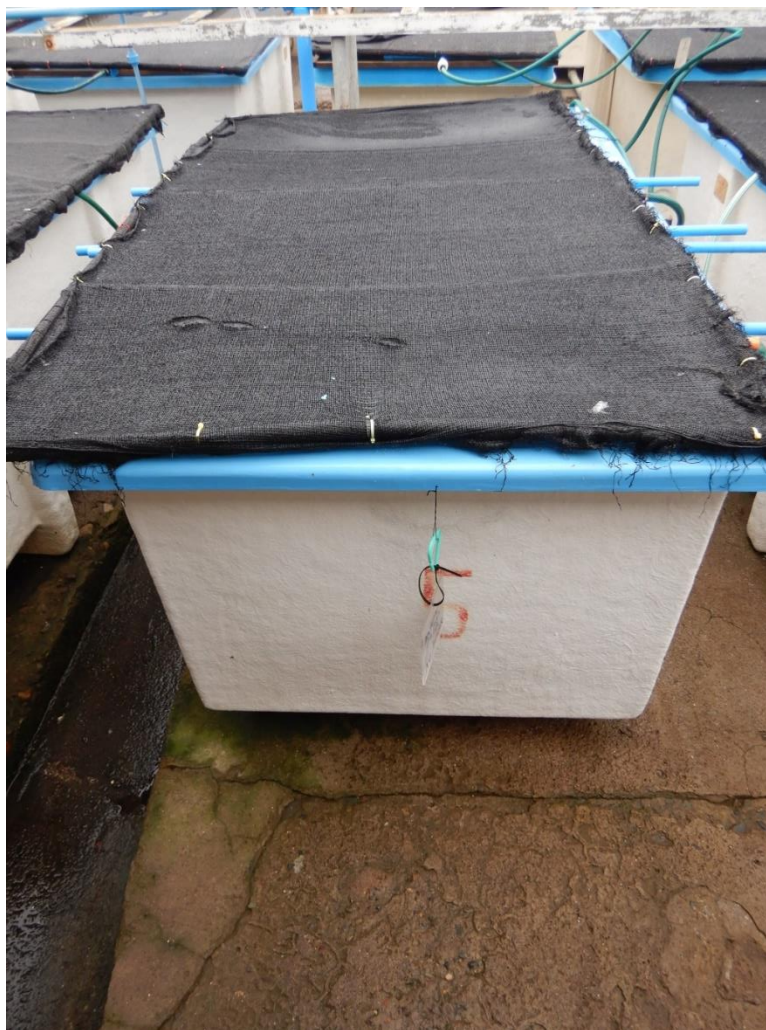

Supplement: s1 [file s1]
